# Supplementary material
Source: publisher figshare collection journal article supplement (https://sage.figshare.com/ndownloader/files/14056895)
Supplement: Supplementary file 1 [file 14056895]

## Codebook for Davis, Fuchs and Johnson: “State Control and the Effects of Foreign Relations on Bilateral Trade” (*Journal of Conflict Resolution*)

### Identifying variables

*Reporter code* [variable name: **code1**] – Reporter country code (China or India).

*Partner code* [variable name: **code**] – Partner country code.

*Year* [variable name: **year**] – Year under observation.

### Trade data

*Imports* [variable name: **imports\_con**] – Imports (in constant 2005 US\$). Source: Own construction as described in the paper.

*(log) Imports* [variable name: **imports\_con\_LN**] – Logged imports (in constant 2005 US\$). Source: Own construction as described in the paper.

*Imports (private)* [variable name: **imports\_pri\_con**] – Imports under control of private enterprises (in constant 2005 US\$). Source: Own construction as described in the paper.

*(log) Imports (private)* [variable name: **imports\_pri\_con\_LN**] – Logged imports under control of private enterprises (in constant 2005 US\$). Source: Own construction as described in the paper.

*Imports (SOE)* [variable name: **imports\_soe\_con**] – Imports under control of state-owned enterprises (in constant 2005 US\$). Source: Own construction as described in the paper.

*(log) Imports (SOE)* [variable name: **imports\_soe\_con\_LN**] – Logged imports under control of state-owned enterprises (in constant 2005 US\$). Source: Own construction as described in the paper.

*Exports (private)* [variable name: **exports\_pri\_con**] – Exports under control of private enterprises (in constant 2005 US\$). Source: Own construction as described in the paper.

*(log) Exports (private)* [variable name: **exports\_pri\_con\_LN**] – Logged exports under control of private enterprises (in constant 2005 US\$). Source: Own construction as described in the paper.

*Exports (SOE)* [variable name: **exports\_soe\_con**] – Exports under control of state-owned enterprises (in constant 2005 US\$). Source: Own construction as described in the paper.

*(log) Exports (SOE)* [variable name: **exports\_soe\_con\_LN**] – Logged exports under control of state-owned enterprises (in constant 2005 US\$). Source: Own construction as described in the paper.

## Variables of interest

*Negative events* [variable name: **GDELTn**] – Sum of the negative events weighted by Goldstein scores (in thousands), lag. Source: GDELT (Leetaru and Schrodtt, 2013).

*(log) Negative events* [variable name: **GDELTn\_In1**] – Logged sum of the negative events weighted by Goldstein scores (in thousands), lag. Source: GDELT (Leetaru and Schrodtt, 2013).

*Negative events (government)* [variable name: **GDELTn\_gov**] – Sum of the negative events weighted by Goldstein scores (government actors, in thousands), lag. Source: GDELT (Leetaru and Schrodtt, 2013).

*(log) Negative events (government)* [variable name: **GDELTn\_gov\_In1**] – Logged sum of the negative events weighted by Goldstein scores (government actors, in thousands), lag. Source: GDELT (Leetaru and Schrodtt, 2013).

*Negative events (military)* [variable name: **GDELTn\_mil**] – Sum of the negative events weighted by Goldstein scores (military actors, in thousands), lag. Source: GDELT (Leetaru and Schrodtt, 2013).

*(log) Negative events (military)* [variable name: **GDELTn\_mil\_In1**] – Logged sum of the negative events weighted by Goldstein scores (military actors, in thousands), lag. Source: GDELT (Leetaru and Schrodtt, 2013).

*UNGA voting (ideal point distance)* [variable name: **ipdistance**] – Distance between a pair of states' foreign policy preferences based on UNGA voting, lag. Source: Bailey, Strezhnev and Voeten (2017).

*(log) UNGA voting (ideal point distance)* [variable name: **ipdistance\_In1**] – Logged distance between a pair of states' foreign policy preferences based on UNGA voting, lag. Source: Bailey, Strezhnev and Voeten (2017).

*Negative events (from King & Lowe)* [variable name: **GNCUM**] – Sum of the negative Goldstein scores. Source: GDELT (King and Lowe, 2003).

*(log) Negative events (from King & Lowe)* [variable name: **GNCUM\_In1**] – Logged sum of the negative Goldstein scores, lag. Source: GDELT (King and Lowe, 2003).

## Control variables

*US ally* [variable name: **atop\_ally\_usa1**] – 1 if the partner country and USA share an alliance, lag. Source: ATOP (atop.rice.edu).

*Common language* [variable name: **comlang\_ethno**] – 1 if China/India and partner country share a language (>9% of the population). Source: CEPII (Mayer and Zignago, 2011).

*Neighbor* [variable name: **contig**] – 1 if China/India and partner country share a common border. Source: CEPII (Mayer and Zignago, 2011).

*Distance* [variable name: **distw**] – Distance between China/India and partner country (between the respective major cities, population-weighted, in km). Source: CEPII (Mayer and Zignago, 2011).

*(log) Distance* [variable name: **distw\_ln**] – Logged distance between China/India and partner country (between the respective major cities, population-weighted, in km). Source: CEPII (Mayer and Zignago, 2011).

*GDP* [variable name: **gdp\_con**] – Gross domestic product of partner country (in constant 2005 US\$). Source: WDI 2013 (data.worldbank.org).

*(log) GDP* [variable name: **gdp\_con\_ln1**] – Logged gross domestic product of partner country (in constant 2005 US\$), lag. Source: WDI 2013 (data.worldbank.org).

*Landlocked* [variable name: **landlocked**] – 1 if partner country is landlocked. Source: CEPII (Mayer and Zignago, 2011).

*Polity* [variable name: **polity21**] – Revised Combined Polity Score of partner country (+10 (strongly democratic) to -10 (strongly autocratic)), lag. Source: Marshall, Gurr and Jaggers (2013).

*Population* [variable name: **population**] – Population size of partner country, lag. Source: WDI 2012 (data.worldbank.org).

*(log) Population* [variable name: **population\_ln1**] – Logged population size of partner country, lag. Source: WDI 2012 (data.worldbank.org).

*WTO member* [variable name: **wto1**] – 1 if partner country is a WTO member in most of the year, lag. Source: WTO (www.wto.org).

## Comparison with South Africa and the United States

*Imports* [variable name: **imports\_usazaf\_con**] – Imports (in constant 2005 US\$). Source: UN Comtrade (wits.worldbank.org). Note: Saved under country code “CHN” for the United States and “IND” for South Africa.

*(log) Imports* [variable name: **imports\_usazaf\_con\_LN**] – Logged imports (in constant 2005 US\$). Source: UN Comtrade (wits.worldbank.org). Note: Saved under country code “CHN” for the United States and “IND” for South Africa.

*Negative events (government)* [variable name: **XGDELTn\_gov**] – Sum of the negative events weighted by Goldstein scores (government actors, in thousands), lag. Source: GDELT (Leetaru and Schrodtt, 2013). Note: Saved under country code “CHN” for the United States and “IND” for South Africa.

*(log) Negative events (government)* [variable name: **XGDELTn\_gov\_ln1**] – Logged sum of the negative events weighted by Goldstein scores (government actors, in thousands), lag. Source: GDELT (Leetaru and Schrodtt, 2013). Note: Saved under country code “CHN” for the United States and “IND” for South Africa.

*Negative events (military)* [variable name: **XGDELTn\_mil**] – Sum of the negative events weighted by Goldstein scores (military actors, in thousands), lag. Source: GDELT (Leetaru and Schrodtt, 2013). Note: Saved under country code “CHN” for the United States and “IND” for South Africa.

*(log) Negative events (military)* [variable name: **XGDELTn\_mil\_ln1**] – Logged sum of the negative events weighted by Goldstein scores (military actors, in thousands), lag. Source: GDELT (Leetaru and Schrodtt, 2013). Note: Saved under country code “CHN” for the United States and “IND” for South Africa.

*UNGA voting (ideal point distance)* [variable name: **Xipdistance**] – Distance between a pair of states’ foreign policy preferences based on UNGA voting, lag. Source: Bailey, Strezhnev and Voeten (2017). Note: Saved under country code “CHN” for the United States and “IND” for South Africa.

*(log) UNGA voting (ideal point distance)* [variable name: **Xipdistance\_ln1**] – Logged distance between a pair of states’ foreign policy preferences based on UNGA voting, lag. Source: Bailey, Strezhnev and Voeten (2017). Note: Saved under country code “CHN” for the United States and “IND” for South Africa.

### **Robustness tests**

Oil states [variable name: **oil\_state**] – 1 if country with gross revenues from net oil exports that exceed ten percent of GDP in 2000. Source: Colgan (2010).

*Note: Please find more detailed descriptions of the construction of the variables in the main paper.*
