# Supplementary material
Source: publisher figshare collection journal article supplement (https://sage.figshare.com/ndownloader/files/14056895)
Supplement: Supplementary file 2 [file 14056895]

Archive with 5 entries (5 files):
- dataset_DFJ_replication.dta
- figure2.dta
- STATE CONTROL replication do file (JCR final).do
- table1.dta
- Davis Fuchs Johnson (JCR) Codebook.pdf
